# Supplementary material
Source: Research Square preprint supplement (doi:10.21203/rs.3.rs-8933198/v1)
Supplement: Supplementary file 1 [file 3de8f85d428a3d89847098c2.docx]

**Table 1**. Baseline characteristics for recruited patients

| Variable | Insignificant PCa (N=91) | Significant PCa (N=70) | p value |
| --- | --- | --- | --- |
| Age [Mean; Median; IQR] | 64.27; 64; 7 | 66.84; 65.5; 10.75 | 0.053³ |
| PSA (ng/mL) [Mean; Median; IQR] | 6.9; 6.31; 3.04 | 7.12; 6.31; 3.05 | 0.373³ |
| Prostate volume (cc) [Mean; Median; IQR] | 49.04; 42; 26 | 41.31; 38; 22.5 | 0.060³ |
| PSA density (ng/mL/cc) [Mean; Median; IQR] | 0.16; 0.15; 0.09 | 0.2; 0.17; 0.1 | 0.017³* |
| ERSPC [Mean; Median; IQR] | 13.78; 10; 10 | 21.94; 15.5; 23.5 | 0.004³* |
| DRE (0: normal; 1: pathologic; 2: no result) [n (%)] |  |  | <0.001²* |
| No result | 1 (1.1%) | 0 (0.0%) |  |
| Normal | 80 (87.9%) | 45 (64.3%) |  |
| Pathologic | 10 (11.0%) | 25 (35.7%) |  |
| Family history [n (%)] |  |  | 0.912¹ |
| No | 76 (83.5%) | 58 (82.9%) |  |
| Yes | 15 (16.5%) | 12 (17.1%) |  |
| Previous biopsy [n (%)] |  |  | 0.098¹ |
| No | 91 (100.0%) | 70 (100.0%) |  |
| Type of biopsy [n (%)] |  |  | 0.283² |
| Systematic | 8 (8.8%) | 7 (10.0%) |  |
| Targeted | 0 (0.0%) | 2 (2.9%) |  |
| Combined | 83 (91.2%) | 61 (87.1%) |  |
| PI-RADS (1-5) [n (%)] |  |  | 0.006²* |
| 1 | 1 (1.1%) | 0 (0.0%) |  |
| 2 | 8 (8.8%) | 2 (2.9%) |  |
| 3 | 6 (6.6%) | 2 (2.9%) |  |
| 4 | 55 (60.4%) | 32 (45.7%) |  |
| 5 | 21 (23.1%) | 34 (48.6%) |  |
| PI-RADS (grouped) [n (%)] |  |  | 0.103² |
| Low (1-2) | 9 (9.9%) | 2 (2.9%) |  |
| Intermediate (3) | 6 (6.6%) | 2 (2.9%) |  |
| High (4-5) | 76 (83.5%) | 66 (94.3%) |  |
| Localisation [n (%)] |  |  | 0.172² |
| Anterior | 1 (1.1%) | 0 (0.0%) |  |
| Peripheral | 64 (70.3%) | 59 (84.3%) |  |
| Transitional | 17 (18.7%) | 8 (11.4%) |  |
| N/A | 9 (9.9%) | 3 (4.3%) |  |
| Treatment [n (%)] |  |  | <0.001²* |
| Active Surveillance | 22 (24.2%) | 0 (0.0%) |  |
| Brachytherapy | 1 (1.1%) | 1 (1.4%) |  |
| other | 2 (2.2%) | 1 (1.4%) |  |
| Prostatectomy | 30 (33.0%) | 31 (44.3%) |  |
| Radiation therapy | 10 (11.0%) | 35 (50.0%) |  |
| watchful waiting | 12 (13.2%) | 0 (0.0%) |  |
| N/A | 14 (15.4%) | 2 (2.9%) |  |
| Status at last follow-up [n (%)] |  |  | 0.105² |
| Free | 67 (73.6%) | 53 (75.7%) |  |
| Relapse | 0 (0.0%) | 3 (4.3%) |  |
| N/A | 24 (26.4%) | 14 (20.0%) |  |

¹ Chi-square, ² Fisher exact, ³ Wilcoxon rank-sum. * p < 0.05
