# Supplementary material
Source: Research Square preprint supplement (doi:10.21203/rs.3.rs-8933198/v1)
Supplement: Supplementary file 2 [file a5cdc357b702913d51b83427.docx]

**Supplementary Table S1: Summary of demographic and clinical variables separated by clinical centre**

**S1. A. Baseline characteristics (Cordoba)**

| Variable | Insignificant PCa (N=24) | Significant PCa (N=41) | p value |
| --- | --- | --- | --- |
| Age [Mean; Median; IQR] | 59.79; 60; 7.25 | 64.51; 65; 8 | 0.011³* |
| PSA (ng/mL) [Mean; Median; IQR] | 6.56; 6.04; 2.59 | 6.94; 6.29; 3.83 | 0.550³ |
| Prostate volume (cc) [Mean; Median; IQR] | 47.67; 43.84; 22 | 40.63; 34; 25 | 0.036³* |
| PSA density (ng/mL/cc) [Mean; Median; IQR] | 0.15; 0.16; 0.07 | 0.2; 0.17; 0.1 | 0.089³ |
| ERSPC [Mean; Median; IQR] | 14.58; 12; 11.25 | 20.12; 13; 24 | 0.323³ |
| DRE (0: normal; 1: pathologic; 2: no result) [n (%)] |  |  | 0.455¹ |
| Normal | 19 (79.2%) | 29 (70.7%) |  |
| Pathologic | 5 (20.8%) | 12 (29.3%) |  |
| Family history [n (%)]  (first-degree relative diagnosed with PCa) |  |  | 0.956¹ |
| No | 18 (75.0%) | 31 (75.6%) |  |
| Yes | 6 (25.0%) | 10 (24.4%) |  |
| Previous biopsy [n (%)] |  |  | 0.035¹* |
| No | 24 (100.0%) | 41 (100.0%) |  |
| Type of biopsy [n (%)] |  |  | 0.083² |
| Systematic | 7 (29.2%) | 4 (9.8%) |  |
| Combined | 17 (70.8%) | 37 (90.2%) |  |
| PI-RADS (1-5) [n (%)] |  |  | <0.001²* |
| 2 | 8 (33.3%) | 2 (4.9%) |  |
| 3 | 5 (20.8%) | 1 (2.4%) |  |
| 4 | 10 (41.7%) | 20 (48.8%) |  |
| 5 | 1 (4.2%) | 18 (43.9%) |  |
| PI-RADS (grouped) [n (%)] |  |  | <0.001²* |
| Low (1-2) | 8 (33.3%) | 2 (4.9%) |  |
| Intermediate (3) | 5 (20.8%) | 1 (2.4%) |  |
| High (4-5) | 11 (45.8%) | 38 (92.7%) |  |
| Localisation [n (%)] |  |  | 0.002²* |
| Anterior | 1 (4.2%) | 0 (0.0%) |  |
| Peripheral | 10 (41.7%) | 32 (78.0%) |  |
| Transitional | 5 (20.8%) | 7 (17.1%) |  |
| N/A | 8 (33.3%) | 2 (4.9%) |  |
| Treatment [n (%)] |  |  | <0.001²* |
| Active Surveillance | 6 (25.0%) | 0 (0.0%) |  |
| Brachytherapy | 1 (4.2%) | 1 (2.4%) |  |
| Prostatectomy | 4 (16.7%) | 21 (51.2%) |  |
| Radiation therapy | 1 (4.2%) | 19 (46.3%) |  |
| watchful waiting | 12 (50.0%) | 0 (0.0%) |  |
| Status at last follow-up [n (%)] |  |  | 0.355² |
| Free | 21 (87.5%) | 30 (73.2%) |  |
| Relapse | 0 (0.0%) | 2 (4.9%) |  |
| N/A | 3 (12.5%) | 9 (22.0%) |  |

¹ Chi-square, ² Fisher exact, ³ Wilcoxon rank-sum. * p < 0.05

**S1. B. Baseline characteristics (Seville)**

| Variable | Insignificant PCa (N=67) | Significant PCa (N=29) | p value |
| --- | --- | --- | --- |
| Age [Mean; Median; IQR] | 65.88; 65; 6 | 70.14; 71; 11 | 0.014³* |
| PSA (ng/mL) [Mean; Median; IQR] | 7.02; 6.35; 3.63 | 7.38; 6.67; 2.44 | 0.289³ |
| Prostate volume (cc) [Mean; Median; IQR] | 49.53; 42; 28 | 42.28; 43; 19 | 0.789³ |
| PSA density (ng/mL/cc) [Mean; Median; IQR] | 0.17; 0.15; 0.11 | 0.19; 0.17; 0.11 | 0.075³ |
| ERSPC [Mean; Median; IQR] | 13.49; 10; 9.5 | 24.52; 20; 23 | 0.001³* |
| DRE (0: normal; 1: pathologic; 2: no result) [n (%)] |  |  | <0.001²* |
| N/A | 1 (1.5%) | 0 (0.0%) |  |
| Normal | 61 (91.0%) | 16 (55.2%) |  |
| Pathologic | 5 (7.5%) | 13 (44.8%) |  |
| Family history [n (%)] |  |  | 0.496² |
| No | 58 (86.6%) | 27 (93.1%) |  |
| Yes | 9 (13.4%) | 2 (6.9%) |  |
| Previous biopsy [n (%)] |  |  | <0.001¹* |
| No | 67 (100.0%) | 29 (100.0%) |  |
| Type of biopsy [n (%)] |  |  | 0.013²* |
| Systematic | 1 (1.5%) | 3 (10.3%) |  |
| Targeted | 0 (0.0%) | 2 (6.9%) |  |
| Combined | 66 (98.5%) | 24 (82.8%) |  |
| PI-RADS (1-5) [n (%)] |  |  | 0.045²* |
| 1 | 1 (1.5%) | 0 (0.0%) |  |
| 3 | 1 (1.5%) | 1 (3.4%) |  |
| 4 | 45 (67.2%) | 12 (41.4%) |  |
| 5 | 20 (29.9%) | 16 (55.2%) |  |
| PI-RADS (grouped) [n (%)] |  |  | 0.665² |
| Low (1-2) | 1 (1.5%) | 0 (0.0%) |  |
| Intermediate (3) | 1 (1.5%) | 1 (3.4%) |  |
| High (4-5) | 65 (97.0%) | 28 (96.6%) |  |
| Localisation [n (%)] |  |  | 0.116² |
| Peripheral | 54 (80.6%) | 27 (93.1%) |  |
| Transitional | 12 (17.9%) | 1 (3.4%) |  |
| N/A | 1 (1.5%) | 1 (3.4%) |  |
| Treatment [n (%)] |  |  | <0.001²* |
| Active Surveillance | 16 (23.9%) | 0 (0.0%) |  |
| other | 2 (3.0%) | 1 (3.4%) |  |
| Prostatectomy | 26 (38.8%) | 10 (34.5%) |  |
| Radiation therapy | 9 (13.4%) | 16 (55.2%) |  |
| N/A | 14 (20.9%) | 2 (6.9%) |  |
| Status at last follow-up [n (%)] |  |  | 0.120² |
| Free | 46 (68.7%) | 23 (79.3%) |  |
| Relapse | 0 (0.0%) | 1 (3.4%) |  |
| N/A | 21 (31.3%) | 5 (17.2%) |  |

¹ Chi-square, ² Fisher exact, ³ Wilcoxon rank-sum. * p < 0.05

**Supplementary Table S2: Baseline characteristics (FIS prostatectomies, N=100)**

| Variable | Overall |
| --- | --- |
| Age [Mean; Median; IQR] | 62.47; 63; 8.25 |
| PSA (ng/mL) [Mean; Median; IQR] | 6.72; 6.31; 3.47 |
| Prostate volume (cc) [Mean; Median; IQR] | 43.58; 41; 21 |
| PSA density (ng/mL/cc) [Mean; Median; IQR] | 0.18; 0.16; 0.09 |
| ERSPC [Mean; Median; IQR] | 14.76; 8.5; 11.75 |
| DRE [n (%)] |  |
| N/A | 4 (4.0%) |
| Normal | 80 (80.0%) |
| Pathologic | 16 (16.0%) |
| Family history [n (%)] |  |
| No | 77 (77.0%) |
| Yes | 23 (23.0%) |
| Type of biopsy [n (%)] |  |
| Targeted | 1 (1.0%) |
| Systematic | 4 (4.0%) |
| Combined | 95 (95.0%) |
| Localization [n (%)] |  |
| Anterior | 3 (3.0%) |
| Peripheral | 85 (85.0%) |
| Transitional | 10 (10.0%) |
| N/A | 2 (2.0%) |
| Cribriform pattern [n (%)] |  |
| No | 95 (95.0%) |
| Yes | 5 (5.0%) |
| Intraductal pattern [n (%)] |  |
| No | 98 (98.0%) |
| Yes | 2 (2.0%) |
| Perineural infiltration [n (%)] |  |
| No | 77 (77.0%) |
| Yes | 23 (23.0%) |
| Status at last follow up [n (%)] |  |
| Free | 01 (91.0%) |
| Relapse | 9 (9.0%) |
| ISUP (RP) [n (%)] |  |
| 1 | 25 (25.0%) |
| 2 | 38 (38.0%) |
| 3 | 33 (33.0%) |
| 4 | 2 (2.0%) |
| 5 | 2 (2.0%) |
| ISUP (biopsy) [n (%)] |  |
| 1 | 30 (30.0%) |
| 2 | 32 (32.0%) |
| 3 | 29 (29.0%) |
| 4 | 7 (7.0%) |
| 5 | 2 (2.0%) |
| T stage [n (%)] |  |
| pT2 | 62 (62.0%) |
| pT3a | 31 (31.0%) |
| pT3b | 7 (7.0%) |

IQR = interquartile range. n (%) = count (percentage, N/A= missing

**Supplementary Table S3: Patient grouping according to PIRADS score**

| PIRADS Group | No Significant Cancer  (ISUP 1) | Significant Cancer  (ISUP ≥ 2) | Total | % Significant |
| --- | --- | --- | --- | --- |
| 1 & 2 | 9 | 2 | 11 | 18.2% |
| 3 | 6 | 2 | 8 | 25.0% |
| 4 & 5 | 76 | 66 | 142 | 46.5% |
| Total | 91 | 70 | 161 | 43.5% |

**Supplementary Table S4.** List of peptide biomarkers included in the 19-BM model.

| Peptide identifier | Mass (Da) | CE retention time (min) | AA Sequence | Protein Symbol | Protein Name |
| --- | --- | --- | --- | --- | --- |
| 77 | 826.21 | 33.75 | -- | -- | -- |
| 579 | 931.48 | 19.98 | EGRQKESV | PPP1R3A | Protein phosphatase 1 regulatory subunit 3A |
| 4769 | 1417.64 | 20.06 | pGPpGpKGDQGPpGP | COL17A1 | Collagen alpha-1(XVII) chain |
| 5168 | 1457.67 | 39.19 | pSGDAGAPGVQGYpGP | COL9A2 | Collagen alpha-2(IX) chain |
| 6543 | 1619.79 | 40.37 | VGPpGPPGpPGPPGPPSAG | COL1A1 | Collagen alpha-1(I) chain |
| 7138 | 1684.79 | 40.49 | PDQQPIPTETFQVAD | F5GYX3 | Semaphorin-7A, SEMA7A |
| 7573 | 1728.76 | 36.62 | ESVVLEPEAT | X3CL1 | Fractalkine |
| 11013 | 2158.97 | 33.20 | AGpPGEAGKpGEQGVPGDLGApGP | COL1A1 | Collagen alpha-1(I) chain |
| 11495 | 2226.96 | 33.46 | GNSGEKGDQGFQGQPGFPGPpGP | COL16A1 | Collagen alpha-1(XVI) chain |
| 11713 | 2256.97 | 33.66 | PGPPGEKGENGDVGPmGppGPpGP | COL11A1 | Collagen alpha-1(XI) chain |
| 13200 | 2471.16 | 34.76 | TGPIGpPGPAGAPGDKGESGpSGPAGPTG | COL1A1 | Collagen alpha-1(I) chain |
| 13634 | 2551.15 | 34.75 | GGPpGMTGFPGAAGRTGPpGpSGISGPpG | COL1A2 | Collagen alpha-2(I) chain |
| 14815 | 2756.29 | 35.2 | pGYPGQpGQDGKPGYQGIAGTpGVpGSPG | COL21A1 | Collagen alpha-1(XXI) chain, COL21A1 |
| 15580 | 2887.35 | 35.57 | GpSGpVGpPGLAGERGEQGPpGPTGFQGLPG | COL5A2 | Collagen alpha-2(V) chain |
| 15679 | 2907.35 | 35.85 | TGEVGAVGPPGFAGEKGpSGEAGTAGPpGTpGP | COL1A2 | Collagen alpha-2(I) chain |
| 17283 | 3265.44 | 35.90 | GPAGQDGVGGDKGEDGDpGQpGPPGPSGEAGPPGpPG | COL11A1 | Collagen alpha-1(XI) chain |
| 17505 | 3318.52 | 30.97 | AGRpGEVGPpGPpGPAGEKGSPGADGPAGAPGTpGPQG | COL1A1 | Collagen alpha-1(I) chain |
| 17585 | 3334.56 | 31.03 | GDPGKNGDKGHAGLAGARGApGPDGNNGAQGPpGPQG | CO1A2_HUMAN | Collagen alpha-2(I) chain (Alpha-2 type I collagen) |
| 21427 | 10753.13 | 19.62 | -- | -- | -- |
