# Supplementary material
Source: Research Square preprint supplement (doi:10.21203/rs.3.rs-8933198/v1)
Supplement: Supplementary file 3 [file ba2fe4f2dedeaf2b4bcaa587.docx]

**Supplementary Text**

**Urine fractionation, peptide extraction and mass spectrometry analysis**

Sample preparation involved diluting 700 μl aliquots of urine in an alkaline buffer containing 2M urea, 10mM NH4OH, and 0.02% SDS (pH 10.5). The samples were then filtered using Centrisart ultracentrifugation filters (Sartorius, Göttingen, Germany) to retain proteins and polypeptides below 20kDa, which were further desalted through PD-10 columns (GE Healthcare, Munich, Germany). CE-MS analysis and data processing followed the ISO13485 standards, generating quality-controlled urinary datasets1,2. Mass spectral ion peaks representing identical molecules at different charge states were converted into single masses using MosaiquesVisu software1,3. Each peptide was defined by its molecular mass, normalized migration time, and normalized signal intensity (AU)3. The CE-MS data was adjusted based on 29 internal collagen fragments that serve as stable internal standards across disease and health states, as presented in the Supplementary table, below4. All detected peptides were saved, matched, and labeled in a Microsoft SQL database2, and these unique data were used as input for this study. Prior to statistical analysis, the data underwent log transformation5.

**Supplementary Table: List of 29 internal peptide calibrants**

|  | **mass [Da]** | **mass standard devation** | **CE-time [min]** | **CE-time standard devation** | **sequence information*** | **parent protein** |
| --- | --- | --- | --- | --- | --- | --- |
| 1 | 1016,45 | 0,02 | 25,8 | 0,2 | ApGDKGESGPS | Collagen alpha-1 (I) chain |
| 2 | 1194,55 | 0,01 | 26,7 | 0,1 | SpGPDGKTGPPGp | Collagen alpha-1 (I) chain |
| 3 | 1250,56 | 0,01 | 27,9 | 0,2 | ApGDRGEpGPpGP | Collagen alpha-1 (I) chain |
| 4 | 1268,57 | 0,01 | 27,3 | 0,2 | SpGERGETGPpGP | Collagen alpha-1 (III) chain |
| 5 | 1378,61 | 0,01 | 28,8 | 0,2 | ApGEDGRpGPpGPQ | Collagen alpha-1 (II) chain |
| 6 | 1435,66 | 0,01 | 28,8 | 0,2 | SpGSPGPDGKTGPpGP | Collagen alpha-1 (I) chain |
| 7 | 1451,66 | 0,01 | 29,2 | 0,4 | SpGSpGPDGKTGPPGp | Collagen alpha-1 (I) chain |
| 8 | 1508,68 | 0,02 | 29,3 | 0,2 | GSpGSpGPDGKTGPPGp | Collagen alpha-1 (I) chain |
| 9 | 1737,78 | 0,02 | 31,0 | 0,2 | TGSpGSpGPDGKTGPPGpAG | Collagen alpha-1 (I) chain |
| 10 | 1834,83 | 0,02 | 31,1 | 0,2 | GLpGTGGPpGENGKpGEPGp | Collagen alpha-1 (III) chain |
| 11 | 2025,87 | 0,02 | 32,2 | 0,1 | SEGSpGHpGQpGpPGPPGApGp | Collagen alpha-1 (III) chain |
| 12 | 2046,92 | 0,03 | 32,6 | 0,2 | PpGEAGKpGEQGVpGDLGApGP | Collagen alpha-1 (I) chain |
| 13 | 2087,97 | 0,02 | 32,9 | 0,1 | GppGEAGKPGEQGVPGDLGAPGp | Collagen alpha-1 (I) chain |
| **mass [Da]** | **mass standard devation** | **CE-time [min]** | **CE-time standard devation** | **sequence information*** | **parent protein** | **mass [Da]** |
| 14 | 2103,96 | 0,02 | 33,0 | 0,2 | GPpGEAGKpGEQGVpGDLGApGP | Collagen alpha-1 (I) chain |
| 15 | 2169,98 | 0,02 | 25,9 | 0,2 | NSGEpGApGSKGDTGAKGEpGPVG | Collagen alpha-1 (I) chain |
| 16 | 2220,99 | 0,02 | 27,1 | 0,2 | ADGQpGAKGEpGDAGAKGDAGPpGP | Collagen alpha-1 (I) chain |
| 17 | 2226,99 | 0,01 | 26,3 | 0,2 | GNSGEpGApGSKGDTGAKGEpGPVG | Collagen alpha-1 (I) chain |
| 18 | 2564,15 | 0,03 | 23,0 | 0,1 | GApGQNGEpGGKGERGApGEKGEGGPpG | Collagen alpha-1 (III) chain |
| 19 | 2679,20 | 0,03 | 23,5 | 0,1 | NRGERGSEGSPGHpGQpGppGpPGAPGP | Collagen alpha-1 (III) chain |
| 20 | 2695,20 | 0,02 | 23,5 | 0,1 | NRGERGSEGSpGHpGQpGppGPPGAPGp | Collagen alpha-1 (III) chain |
| 21 | 2742,25 | 0,03 | 29,0 | 0,1 | KNGETGPQGPpGPTGPGGDKGDTGPpGPQG | Collagen alpha-1 (III) chain |
| 22 | 2825,27 | 0,03 | 24,5 | 0,1 | ERGEAGIpGVpGAKGEDGKDGSpGEpGANG | Collagen alpha-1 (III) chain |
| 23 | 1523,74 | 0,02 | 40,7 | 0,7 | GD***P***GPPGpPGpPGpPAI | Collagen alpha-1 (XV) chain |
| 24 | 1579,71 | 0,01 | 29,8 | 0,1 | SpGSpG***P***DGKTGPPGpAG | Collagen alpha-1 (I) chain |
| 25 | 2063,93 | 0,02 | 22,0 | 0,1 | NGDDGEAGKpGRpGERG***P***pGP | Collagen alpha-1 (I) chain |
| 26 | 2078,93 | 0,01 | 26,7 | 0,2 | DAGApGApGGKGDAGApGERG***P***pG | Collagen alpha-1 (III) chain |
| 27 | 2159,00 | 0,03 | 33,2 | 0,1 | AG***P***pGEAGKpGEQGVpGDLGAPGP | Collagen alpha-1 (I) chain |
| 28 | 2175,01 | 0,02 | 33,3 | 0,2 | AG***P***pGEAGKpGEQGVpGDLGApGP | Collagen alpha-1 (I) chain |
| 29 | 2292,02 | 0,02 | 27,3 | 0,1 | ADGQpGAKGEpGDAGAKGDAG***P***pGPA | Collagen alpha-1 (I) chain |

**References**

1. Zürbig P, Renfrow MB, Schiffer E, et al. Biomarker discovery by CE-MS enables sequence analysis via MS/MS with platform-independent separation. *Electrophoresis*. 2006;27(11):2111-2125.

2. Latosinska A, Siwy J, Mischak H, Frantzi M. Peptidomics and proteomics based on CE-MS as a robust tool in clinical application: The past, the present, and the future. *Electrophoresis*. 2019;40(18-19):2294-2308.

3. Frantzi M, Metzger J, Banks RE, et al. Discovery and validation of urinary biomarkers for detection of renal cell carcinoma. *J Proteomics*. 2014;98:44-58.

4. Siwy J, Mullen W, Golovko I, Franke J, Zürbig P. Human urinary peptide database for multiple disease biomarker discovery. *Proteomics Clin Appl*. 2011;5(5-6):367-374.

5. Dakna M, Harris K, Kalousis A, et al. Addressing the challenge of defining valid proteomic biomarkers and classifiers. *BMC Bioinformatics*. 2010;11:594.
